# Supplementary material for: CDKN1C (p57KIP2) Is a Direct Target of EZH2 and Suppressed by Multiple Epigenetic Mechanisms in Breast Cancer Cells
Source: PLoS One. 2009 Apr 2;4(4):e5011. doi: 10.1371/journal.pone.0005011 (PMC2659786; doi:10.1371/journal.pone.0005011)
Supplement: Table S2 — (0.03 MB XLS) [file pone.0005011.s002.xls]

## Sheet: Sheet1
Supplementary Table 2
Primer list for CHIP assay				Primer list for MSP assay
All primers are listed in the 5’ to 3’ orientation				All primers are listed in the 5’ to 3’ orientation
p57-CF1	TGGCTTTTGGTTCCACCATC			p57-U-M1-F	TTTATTTGGTGTAGGTTAGGGTTGA
p57-CR1	TCTTCTGGGTCTCAGGGAAG			p57-U-M1-R	TAACAAATCCAATATCCAAC
p57-CF2	TCCGCAGATAGCGGCTTCAG			p57-M-M1-F	ATTCGGCGTAGGTTAGGGTC
p57-CR2	TCAGCTCCACTCTTTCCCCG			p57-M-M1-R	CTCCTAACGAATCCGATATCCG
p57-CF3	GCTGGCAGCGGCGGGTCCAA			p57-U-M2-F	TAGTGGGGTGGTTGTTAATTG
p57-CR3	TCCGGCCAGGCCCAACTCGA			p57-U-M2-R	CCTACACCCCCTTTATACAC
p57-CF4	GCGTTCCACAGGCCAAGTGC			p57-M-M2-F	GCGGGGCGGTCGTTAATC
p57-CR4	TCCGGTGGTGGACTCTTCTG			p57-M-M2-R	CCTACGCCCCCTTTATACG
p57-CF5	TCTCGCTGTCCTCTCCTCTC			p57-U-M3-F	GTTGAATGTTGAGGATTAGAATTGT
p57-CR5	GCACTAGTACTGGGAAGGTC			p57-U-M3-R	CAAAAAACAAACTAACAACCACCAC
p57-CF6	CCCTGGACGCCTGCAGTG			p57-M-M3-F	AGTTGAACGTCGAGGATTAGAATC
p57-CR6	CTCAGCGGCCGGCTCGAG			p57-M-M3-R	GAAAAACGAACTAACAACCACCG
p57-CF7	GCGGCGATCAAGAAGCTGTC
p57-CR7	CCCTTTAATGCCACGGGAGG
p57-CF8	AGGCCGAAAAATGCTGCAACTC
p57-CR8	GGCCCAGCCAGGAGAGAGG
Primer list for RT-PCR assay				Primer list for BGS assay
All primers are listed in the 5’ to 3’ orientation				All primers are listed in the 5’ to 3’ orientation
p57-F1	ATGTCCGACGCGTCCCTCC			BGS-F1	GTTGAAATTGAAAATATTATATTATG
p57-R1	CGAGTCGCTGTCCACTTCGG			BGS-R1	ATACCTACTAACTAACTT
LIT1-F2	AAGAAAGTGTTGAGTGGTAA			BGS-F2	TGGATTAYGAGGAGTTGA
LIT1-R2	GATGATCTGAAAATGGAAAA			BGS-R2	AAACACTAAACAACTACTCC
